# Supplementary figures and images for: Autocrine CTHRC1 activates hepatic stellate cells and promotes liver fibrosis by activating TGF-β signaling
Source: PubMed Central journal article supplement — eBioMedicine. 2019 Jan 11;40:43–55. doi: 10.1016/j.ebiom.2019.01.009 (PMC6412555; doi:10.1016/j.ebiom.2019.01.009), 2019-01-11

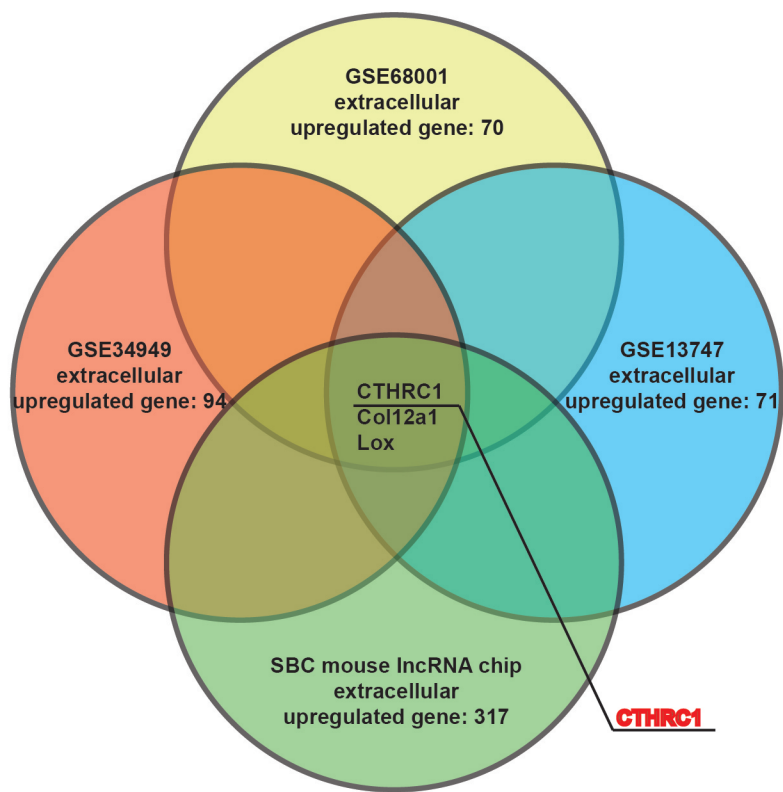

Log(Fold change) > 3, P < 0.05

Supplementary Figure 1

Supplement: mmc1.pdf [file mmc1.pdf]

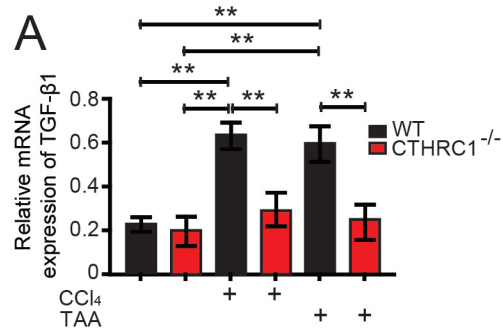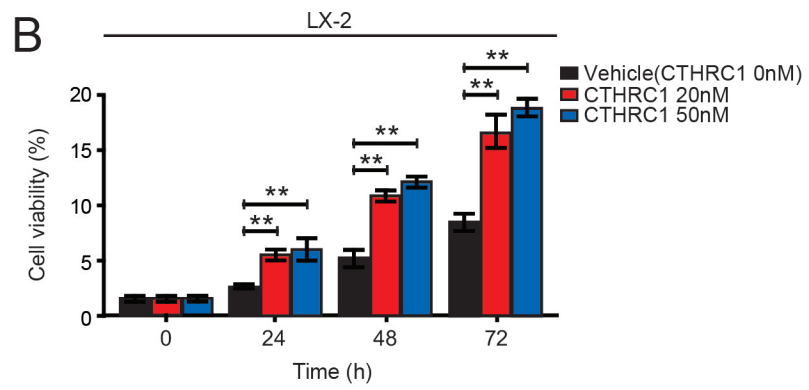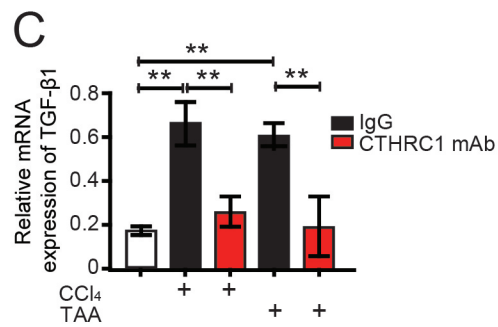

Supplementary Figure 2

Supplement: mmc2.pdf [file mmc2.pdf]

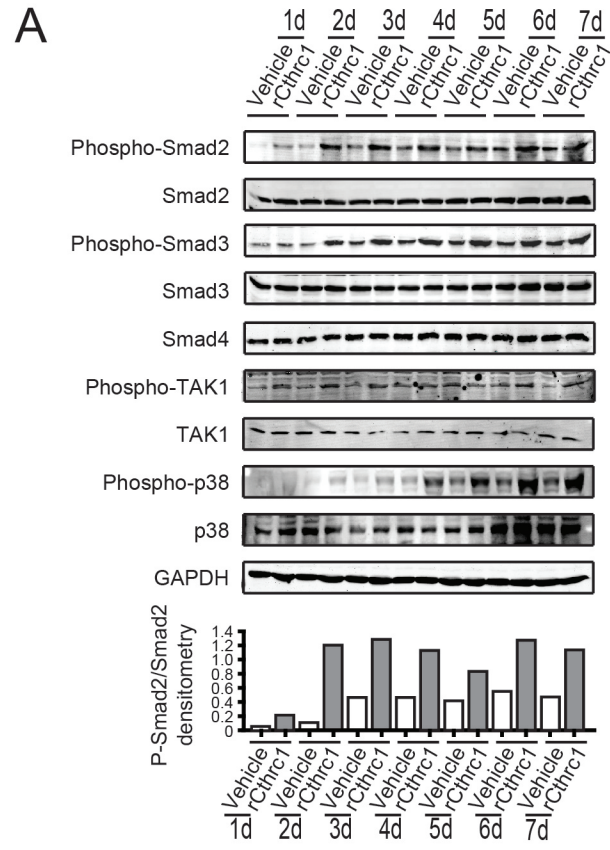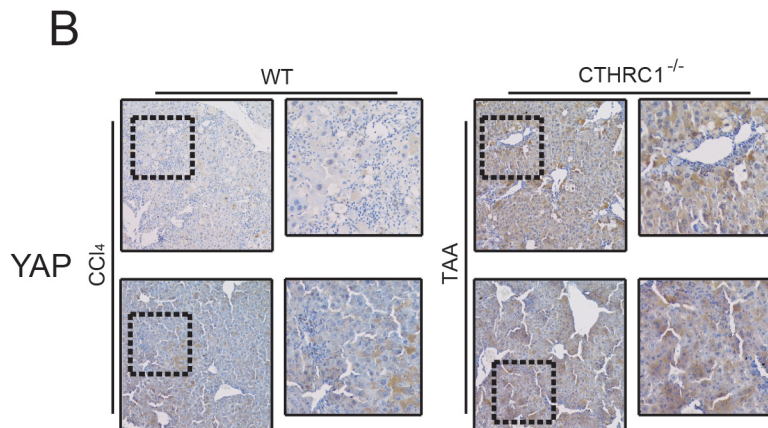

Supplementary Figure 3

Supplement: mmc3.pdf [file mmc3.pdf]

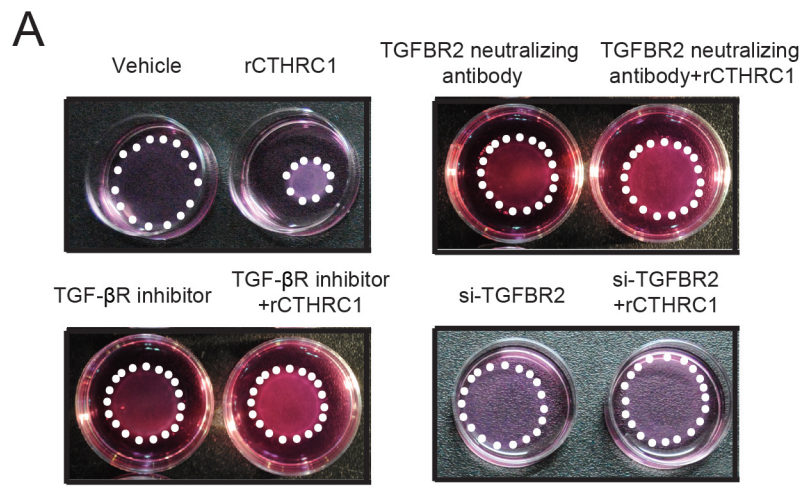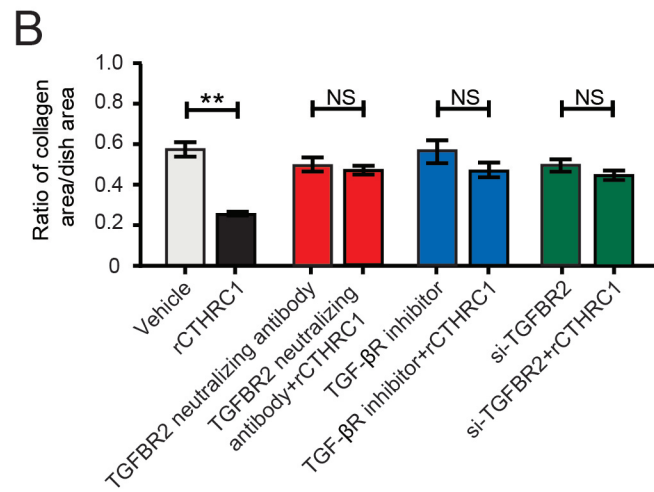

Supplementary Figure 4

Supplement: mmc4.pdf [file mmc4.pdf]

A

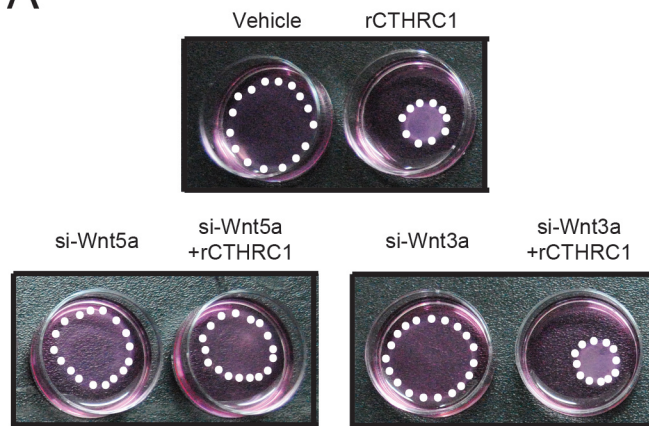

B

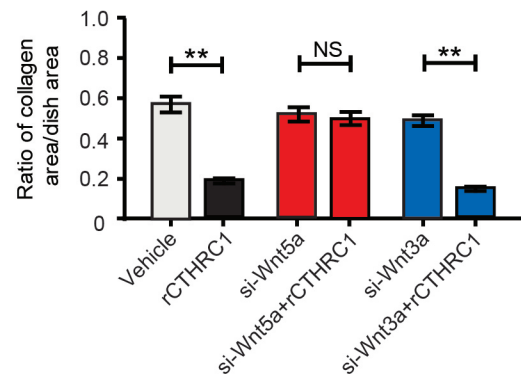

Supplement: mmc5.pdf [file mmc5.pdf]

A

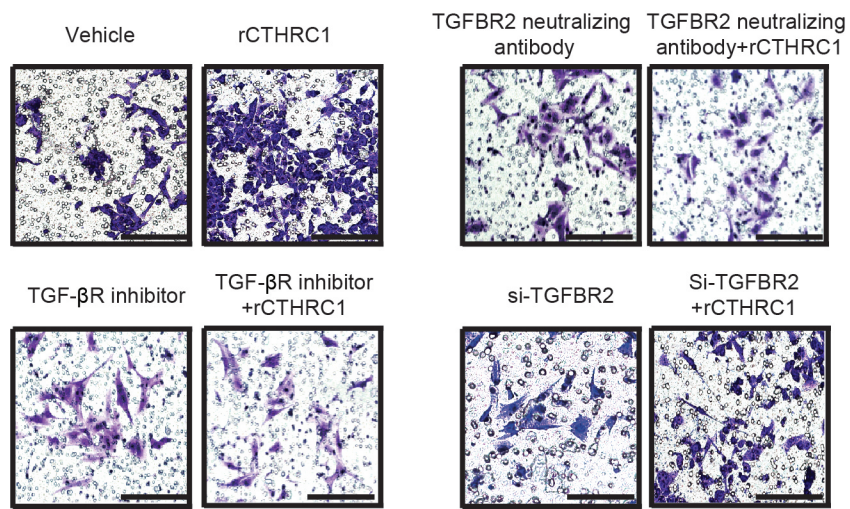

B

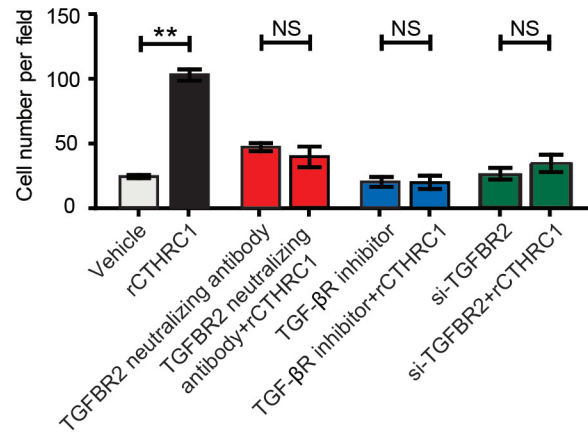

Supplement: mmc6.pdf [file mmc6.pdf]

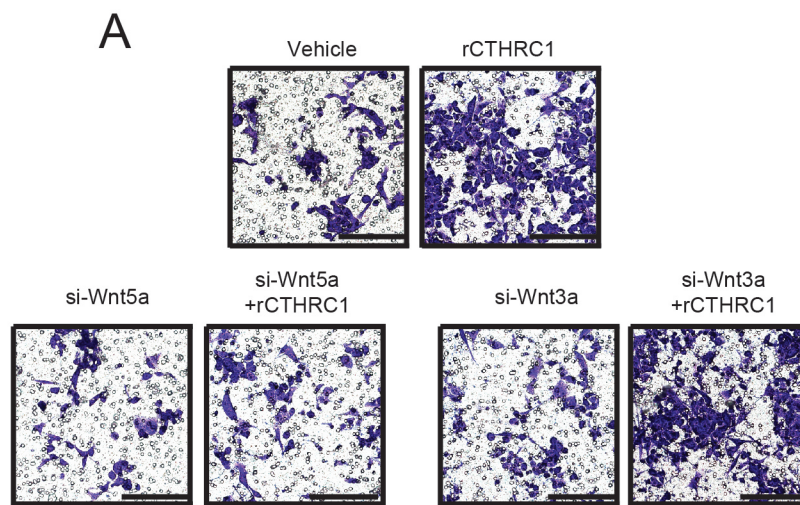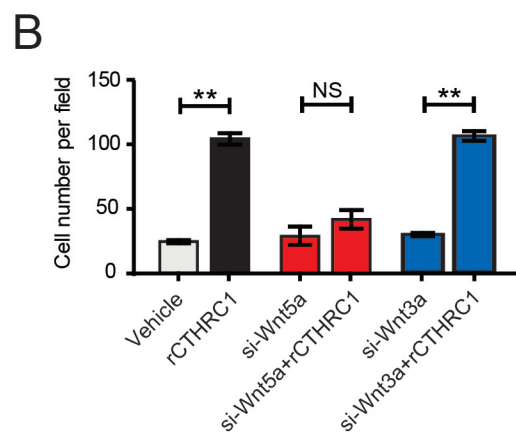

Supplement: mmc7.pdf [file mmc7.pdf]
